# Supplementary material for: TESTLoc: protein subcellular localization prediction from EST data
Source: Springer Nature journal article supplement (doi:10.1186/1471-2105-11-563), 2010-11-15

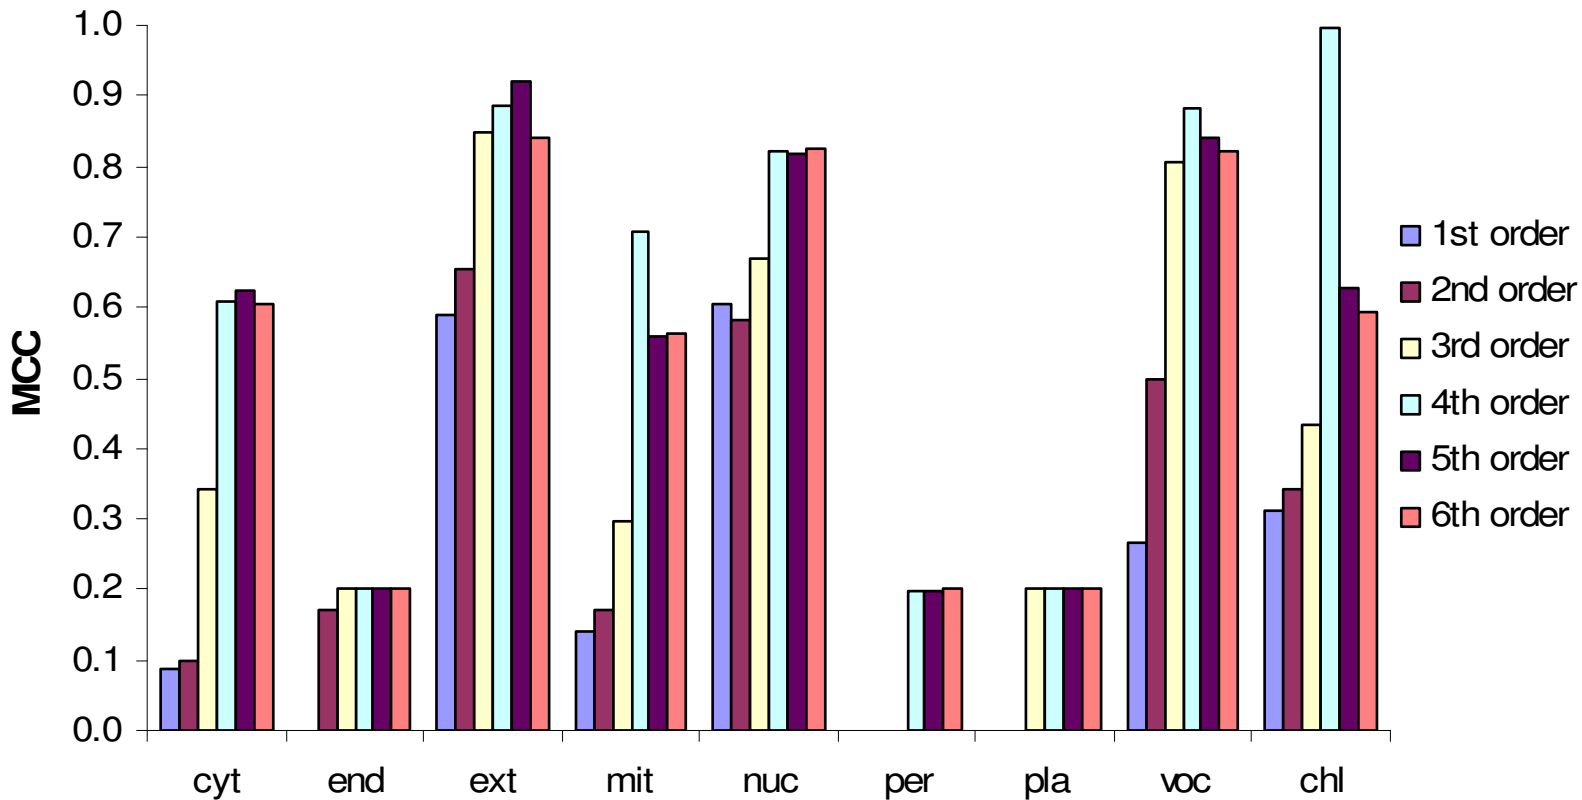

Supplement: 12859_2010_4146_MOESM12_ESM.pdf [file 12859_2010_4146_MOESM12_ESM.pdf]
